# Supplementary material
Source: publisher figshare collection journal article supplement (https://acs.figshare.com/ndownloader/files/25546329)
Supplement: Supplementary file 1 [file 25546329]

Archive with 3 entries (3 files):
- info.xml
- tx0c00264_high_quality.mp4
- tx0c00264.pdf
