# Supplementary material
Source: publisher figshare collection journal article supplement (https://acs.figshare.com/ndownloader/files/25546329)
Supplement: Supplementary file 1 [file 25546329 › info.xml]

<presentation>
	<article>
		<title>The Tox21 10K Compound Library: Collaborative chemistry advancing toxicology</title>
		<doi>10.1021/acs.chemrestox.0c00264</doi>
		<copyright>American Chemical Society</copyright>
		<narrator>Ann M Richard</narrator>
		<contact>Ann Richard</contact>
		<contact-email>Richard.Ann@epa.gov</contact-email>
		<author-list>
			<author>Ann M Richard</author>
		</author-list>
	</article>
	<slides height-width-ratio=".75">
		<slide audio-time="80">
			<subtitle/>
		</slide>
		<slide audio-time="94">
			<subtitle/>
		</slide>
		<slide audio-time="57">
			<subtitle/>
		</slide>
		<slide audio-time="43">
			<subtitle/>
		</slide>
		<slide audio-time="53">
			<subtitle/>
		</slide>
		<slide audio-time="74">
			<subtitle/>
		</slide>
		<slide audio-time="78">
			<subtitle/>
		</slide>
		<slide audio-time="19">
			<subtitle/>
		</slide>
	</slides>
	<audio duration="498"/>
</presentation>
